# Supplementary material
Source: publisher figshare collection journal article supplement (https://acs.figshare.com/ndownloader/files/4133371)
Supplement: Supplementary file 1 [file 4133371]

  
data_wzz34dhso0521_3_110523_2 
  
_audit_creation_method            SHELXL-97 
_chemical_name_systematic 
; 
 Oxi34dhBA 
; 
_chemical_name_common             ? 
_chemical_melting_point           ? 
_chemical_formula_moiety          'C6 H10 N2 O3, C7 H6 O4' 
_chemical_formula_sum 
 'C13 H16 N2 O7' 
_chemical_formula_weight          312.28 
  
loop_ 
 _atom_type_symbol 
 _atom_type_description 
 _atom_type_scat_dispersion_real 
 _atom_type_scat_dispersion_imag 
 _atom_type_scat_source 
 'C'  'C'   0.0181   0.0091 
 'International Tables Vol C Tables 4.2.6.8 and 6.1.1.4' 
 'H'  'H'   0.0000   0.0000 
 'International Tables Vol C Tables 4.2.6.8 and 6.1.1.4' 
 'N'  'N'   0.0311   0.0180 
 'International Tables Vol C Tables 4.2.6.8 and 6.1.1.4' 
 'O'  'O'   0.0492   0.0322 
 'International Tables Vol C Tables 4.2.6.8 and 6.1.1.4' 
  
_symmetry_cell_setting            Monoclinic 
_symmetry_space_group_name_H-M    C2 
  
loop_ 
 _symmetry_equiv_pos_as_xyz 
 'x, y, z' 
 '-x, y, -z' 
 'x+1/2, y+1/2, z' 
 '-x+1/2, y+1/2, -z' 
  
_cell_length_a                    22.2113(6) 
_cell_length_b                    6.0673(2) 
_cell_length_c                    11.2292(3) 
_cell_angle_alpha                 90.00 
_cell_angle_beta                  112.595(3) 
_cell_angle_gamma                 90.00 
_cell_volume                      1397.12(7) 
_cell_formula_units_Z             4 
_cell_measurement_temperature     100(2) 
_cell_measurement_reflns_used     ? 
_cell_measurement_theta_min       ? 
_cell_measurement_theta_max       ? 
  
_exptl_crystal_description        block 
_exptl_crystal_colour             colorless 
_exptl_crystal_size_max           0.40 
_exptl_crystal_size_mid           0.20 
_exptl_crystal_size_min           0.20 
_exptl_crystal_density_meas       ? 
_exptl_crystal_density_diffrn     1.485 
_exptl_crystal_density_method     'not measured' 
_exptl_crystal_F_000              656 
_exptl_absorpt_coefficient_mu     1.046 
_exptl_absorpt_correction_type    'multi-scan' 
_exptl_absorpt_correction_T_min   0.6797 
_exptl_absorpt_correction_T_max   0.8181 
_exptl_absorpt_process_details
;
CrysAlisPro, Oxford Diffraction Ltd.,
Version 1.171.34.44 (release 25-10-2010 CrysAlis171 .NET)
(compiled Oct 25 2010,18:11:34)
Empirical absorption correction using spherical harmonics,
 implemented in SCALE3 ABSPACK scaling algorithm.
; 
_exptl_special_details 
; 
 ? 
; 
  
_diffrn_ambient_temperature       100(2) 
_diffrn_radiation_wavelength 1.5418
_diffrn_radiation_type 'Cu K\a'
_diffrn_radiation_source 'Nova (Cu) X-ray Source'
_diffrn_radiation_monochromator 'mirror'
_diffrn_measurement_device_type 'Xcalibur, Onyx, Nova'
_diffrn_measurement_method        'phi and omega scans' 
_diffrn_detector_area_resol_mean  ? 
_diffrn_standards_number          ? 
_diffrn_standards_interval_count  ? 
_diffrn_standards_interval_time   ? 
_diffrn_standards_decay_%         ? 
_diffrn_reflns_number             19455 
_diffrn_reflns_av_R_equivalents   0.0453 
_diffrn_reflns_av_sigmaI/netI     0.0249 
_diffrn_reflns_limit_h_min        -27 
_diffrn_reflns_limit_h_max        27 
_diffrn_reflns_limit_k_min        -7 
_diffrn_reflns_limit_k_max        7 
_diffrn_reflns_limit_l_min        -13 
_diffrn_reflns_limit_l_max        13 
_diffrn_reflns_theta_min          4.26 
_diffrn_reflns_theta_max          72.72 
_reflns_number_total              2748 
_reflns_number_gt                 2562 
_reflns_threshold_expression      >2sigma(I) 
  
_computing_data_collection
;
CrysAlisPro, Oxford Diffraction Ltd.,
Version 1.171.34.44 (release 25-10-2010 CrysAlis171 .NET)
(compiled Oct 25 2010,18:11:34)
;
_computing_cell_refinement
;
CrysAlisPro, Oxford Diffraction Ltd.,
Version 1.171.34.44 (release 25-10-2010 CrysAlis171 .NET)
(compiled Oct 25 2010,18:11:34)
;
_computing_data_reduction
;
CrysAlisPro, Oxford Diffraction Ltd.,
Version 1.171.34.44 (release 25-10-2010 CrysAlis171 .NET)
(compiled Oct 25 2010,18:11:34)
;
_computing_structure_solution     'SHELXS-97 (Sheldrick, 1990)' 
_computing_structure_refinement   'SHELXL-97 (Sheldrick, 1997)' 
_computing_molecular_graphics     'Bruker SHELXTL' 
_computing_publication_material   'Bruker SHELXTL' 
  
_refine_special_details 
; 
 Refinement of F^2^ against ALL reflections.  The weighted R-factor wR and 
 goodness of fit S are based on F^2^, conventional R-factors R are based 
 on F, with F set to zero for negative F^2^. The threshold expression of 
 F^2^ > 2sigma(F^2^) is used only for calculating R-factors(gt) etc. and is 
 not relevant to the choice of reflections for refinement.  R-factors based 
 on F^2^ are statistically about twice as large as those based on F, and R- 
 factors based on ALL data will be even larger. 
; 
  
_refine_ls_structure_factor_coef  Fsqd 
_refine_ls_matrix_type            full 
_refine_ls_weighting_scheme       calc 
_refine_ls_weighting_details 
 'calc w=1/[\s^2^(Fo^2^)+(0.0855P)^2^+0.6446P] where P=(Fo^2^+2Fc^2^)/3' 
_atom_sites_solution_primary      direct 
_atom_sites_solution_secondary    difmap 
_atom_sites_solution_hydrogens    geom 
_refine_ls_hydrogen_treatment     constr 
_refine_ls_extinction_method      none 
_refine_ls_extinction_coef        ? 
_chemical_absolute_configuration  rmad
_refine_ls_abs_structure_details 
 'Flack H D (1983), Acta Cryst. A39, 876-881' 
_refine_ls_abs_structure_Flack    0.2(2) 
_refine_ls_number_reflns          2748 
_refine_ls_number_parameters      203 
_refine_ls_number_restraints      1 
_refine_ls_R_factor_all           0.0516 
_refine_ls_R_factor_gt            0.0472 
_refine_ls_wR_factor_ref          0.1258 
_refine_ls_wR_factor_gt           0.1214 
_refine_ls_goodness_of_fit_ref    1.050 
_refine_ls_restrained_S_all       1.050 
_refine_ls_shift/su_max           0.000 
_refine_ls_shift/su_mean          0.000 
  
loop_ 
 _atom_site_label 
 _atom_site_type_symbol 
 _atom_site_fract_x 
 _atom_site_fract_y 
 _atom_site_fract_z 
 _atom_site_U_iso_or_equiv 
 _atom_site_adp_type 
 _atom_site_occupancy 
 _atom_site_symmetry_multiplicity 
 _atom_site_calc_flag 
 _atom_site_refinement_flags 
 _atom_site_disorder_assembly 
 _atom_site_disorder_group 
C1 C 0.31248(12) 0.2390(4) 0.7347(2) 0.0299(5) Uani 1 1 d . . . 
C2 C 0.29625(12) 0.0412(5) 0.6440(2) 0.0335(6) Uani 1 1 d . . . 
H2C H 0.2882 -0.0885 0.6894 0.040 Uiso 1 1 calc R . . 
H2D H 0.2556 0.0722 0.5687 0.040 Uiso 1 1 calc R . . 
C3 C 0.38801(12) -0.2112(4) 0.6325(2) 0.0303(5) Uani 1 1 d . . . 
H3A H 0.3613 -0.3443 0.6270 0.036 Uiso 1 1 calc R . . 
H3B H 0.4223 -0.2006 0.7203 0.036 Uiso 1 1 calc R . . 
C4 C 0.41753(11) -0.2140(4) 0.5293(2) 0.0296(5) Uani 1 1 d . . . 
H4 H 0.4620 -0.2820 0.5622 0.036 Uiso 1 1 calc R . . 
C5 C 0.41954(12) 0.0293(4) 0.4967(2) 0.0293(5) Uani 1 1 d . . . 
H5A H 0.4616 0.0971 0.5518 0.035 Uiso 1 1 calc R . . 
H5B H 0.4130 0.0489 0.4050 0.035 Uiso 1 1 calc R . . 
C6 C 0.36393(11) 0.1276(4) 0.5238(2) 0.0264(5) Uani 1 1 d . . . 
C7 C 0.36158(11) 0.7649(4) 0.9641(2) 0.0290(5) Uani 1 1 d . . . 
C8 C 0.38472(11) 0.9588(4) 1.0486(2) 0.0273(5) Uani 1 1 d . . . 
C9 C 0.33890(11) 1.0906(4) 1.0726(2) 0.0280(5) Uani 1 1 d . . . 
H9 H 0.2940 1.0526 1.0362 0.034 Uiso 1 1 calc R . . 
C10 C 0.35900(11) 1.2766(4) 1.1494(2) 0.0285(5) Uani 1 1 d . . . 
C11 C 0.42507(12) 1.3337(4) 1.2020(2) 0.0304(5) Uani 1 1 d . . . 
C12 C 0.47035(11) 1.2049(5) 1.1764(2) 0.0326(5) Uani 1 1 d . . . 
H12 H 0.5151 1.2457 1.2103 0.039 Uiso 1 1 calc R . . 
C13 C 0.45022(12) 1.0155(5) 1.1009(2) 0.0317(5) Uani 1 1 d . . . 
H13 H 0.4814 0.9254 1.0853 0.038 Uiso 1 1 calc R . . 
O1 O 0.33682(9) 0.3081(3) 0.48674(17) 0.0346(4) Uani 1 1 d . . . 
O2 O 0.37429(8) -0.3200(3) 0.41372(15) 0.0303(4) Uani 1 1 d . . . 
H2 H 0.3642 -0.4453 0.4320 0.045 Uiso 1 1 calc R . . 
O3 O 0.36939(8) 0.3046(3) 0.79150(16) 0.0332(4) Uani 1 1 d . . . 
O4 O 0.30319(8) 0.7206(3) 0.90673(17) 0.0334(4) Uani 1 1 d . . . 
O5 O 0.40786(8) 0.6435(3) 0.95066(16) 0.0342(4) Uani 1 1 d . . . 
H5O H 0.3910 0.5512 0.8914 0.051 Uiso 1 1 calc R . . 
O6 O 0.44618(9) 1.5142(4) 1.27800(17) 0.0380(4) Uani 1 1 d . . . 
H6O H 0.4157 1.5643 1.2968 0.057 Uiso 1 1 calc R . . 
O7 O 0.31773(8) 1.4136(3) 1.17736(17) 0.0355(4) Uani 1 1 d . . . 
H7O H 0.2797 1.3620 1.1460 0.053 Uiso 1 1 calc R . . 
N1 N 0.34759(10) -0.0117(3) 0.59882(19) 0.0282(4) Uani 1 1 d . . . 
N2 N 0.26143(10) 0.3297(4) 0.7488(2) 0.0354(5) Uani 1 1 d . . . 
H2A H 0.2668 0.4430 0.8008 0.043 Uiso 1 1 calc R . . 
H2B H 0.2221 0.2766 0.7062 0.043 Uiso 1 1 calc R . . 
  
loop_ 
 _atom_site_aniso_label 
 _atom_site_aniso_U_11 
 _atom_site_aniso_U_22 
 _atom_site_aniso_U_33 
 _atom_site_aniso_U_23 
 _atom_site_aniso_U_13 
 _atom_site_aniso_U_12 
C1 0.0321(12) 0.0316(14) 0.0287(11) -0.0006(10) 0.0146(9) 0.0005(10) 
C2 0.0351(12) 0.0326(14) 0.0383(13) -0.0073(11) 0.0201(10) -0.0059(10) 
C3 0.0382(12) 0.0243(12) 0.0278(10) 0.0009(10) 0.0121(9) 0.0041(10) 
C4 0.0298(11) 0.0299(13) 0.0274(11) -0.0042(10) 0.0090(9) 0.0019(10) 
C5 0.0318(12) 0.0271(13) 0.0310(11) -0.0014(10) 0.0142(9) -0.0009(10) 
C6 0.0309(11) 0.0225(13) 0.0265(10) -0.0010(9) 0.0117(8) -0.0018(9) 
C7 0.0299(11) 0.0321(14) 0.0270(11) 0.0015(10) 0.0132(9) 0.0021(10) 
C8 0.0297(11) 0.0286(13) 0.0254(10) 0.0005(9) 0.0126(9) 0.0013(9) 
C9 0.0254(11) 0.0312(13) 0.0268(11) 0.0002(9) 0.0094(8) -0.0006(9) 
C10 0.0294(11) 0.0316(14) 0.0250(10) 0.0005(10) 0.0110(9) -0.0009(10) 
C11 0.0319(12) 0.0321(15) 0.0263(11) -0.0006(10) 0.0101(9) -0.0045(10) 
C12 0.0275(11) 0.0397(15) 0.0284(11) 0.0008(11) 0.0084(9) -0.0027(11) 
C13 0.0289(11) 0.0396(14) 0.0278(11) 0.0002(11) 0.0123(9) 0.0011(11) 
O1 0.0402(9) 0.0258(9) 0.0389(9) 0.0018(8) 0.0166(7) 0.0023(8) 
O2 0.0377(9) 0.0241(9) 0.0286(8) -0.0032(7) 0.0121(7) -0.0005(7) 
O3 0.0310(8) 0.0359(10) 0.0336(8) -0.0037(8) 0.0133(7) -0.0006(7) 
O4 0.0300(8) 0.0339(10) 0.0367(8) -0.0066(7) 0.0132(7) -0.0020(7) 
O5 0.0323(8) 0.0366(10) 0.0338(8) -0.0059(8) 0.0127(7) 0.0050(8) 
O6 0.0349(9) 0.0412(11) 0.0382(9) -0.0111(9) 0.0144(7) -0.0077(8) 
O7 0.0296(8) 0.0373(10) 0.0395(9) -0.0077(8) 0.0130(7) 0.0017(8) 
N1 0.0327(10) 0.0238(11) 0.0319(10) -0.0008(8) 0.0167(8) -0.0001(8) 
N2 0.0306(10) 0.0374(13) 0.0389(10) -0.0107(10) 0.0140(8) 0.0009(9) 
  
_geom_special_details 
; 
 All esds (except the esd in the dihedral angle between two l.s. planes) 
 are estimated using the full covariance matrix.  The cell esds are taken 
 into account individually in the estimation of esds in distances, angles 
 and torsion angles; correlations between esds in cell parameters are only 
 used when they are defined by crystal symmetry.  An approximate (isotropic) 
 treatment of cell esds is used for estimating esds involving l.s. planes. 
; 
  
loop_ 
 _geom_bond_atom_site_label_1 
 _geom_bond_atom_site_label_2 
 _geom_bond_distance 
 _geom_bond_site_symmetry_2 
 _geom_bond_publ_flag 
C1 O3 1.243(3) . ? 
C1 N2 1.324(3) . ? 
C1 C2 1.525(4) . ? 
C2 N1 1.451(3) . ? 
C3 N1 1.467(3) . ? 
C3 C4 1.535(3) . ? 
C4 O2 1.436(3) . ? 
C4 C5 1.526(4) . ? 
C5 C6 1.505(3) . ? 
C6 O1 1.241(3) . ? 
C6 N1 1.338(3) . ? 
C7 O4 1.236(3) . ? 
C7 O5 1.320(3) . ? 
C7 C8 1.475(4) . ? 
C8 C13 1.387(3) . ? 
C8 C9 1.399(3) . ? 
C9 C10 1.386(3) . ? 
C10 O7 1.360(3) . ? 
C10 C11 1.399(3) . ? 
C11 O6 1.356(3) . ? 
C11 C12 1.388(4) . ? 
C12 C13 1.396(4) . ? 
  
loop_ 
 _geom_angle_atom_site_label_1 
 _geom_angle_atom_site_label_2 
 _geom_angle_atom_site_label_3 
 _geom_angle 
 _geom_angle_site_symmetry_1 
 _geom_angle_site_symmetry_3 
 _geom_angle_publ_flag 
O3 C1 N2 123.7(2) . . ? 
O3 C1 C2 121.9(2) . . ? 
N2 C1 C2 114.4(2) . . ? 
N1 C2 C1 113.1(2) . . ? 
N1 C3 C4 102.20(19) . . ? 
O2 C4 C5 106.72(19) . . ? 
O2 C4 C3 110.83(19) . . ? 
C5 C4 C3 103.3(2) . . ? 
C6 C5 C4 103.48(19) . . ? 
O1 C6 N1 123.7(2) . . ? 
O1 C6 C5 127.7(2) . . ? 
N1 C6 C5 108.6(2) . . ? 
O4 C7 O5 121.8(2) . . ? 
O4 C7 C8 123.1(2) . . ? 
O5 C7 C8 115.1(2) . . ? 
C13 C8 C9 119.9(2) . . ? 
C13 C8 C7 121.3(2) . . ? 
C9 C8 C7 118.7(2) . . ? 
C10 C9 C8 120.1(2) . . ? 
O7 C10 C9 123.8(2) . . ? 
O7 C10 C11 116.2(2) . . ? 
C9 C10 C11 119.9(2) . . ? 
O6 C11 C12 118.8(2) . . ? 
O6 C11 C10 121.2(2) . . ? 
C12 C11 C10 120.0(2) . . ? 
C11 C12 C13 120.1(2) . . ? 
C8 C13 C12 120.0(2) . . ? 
C6 N1 C2 121.3(2) . . ? 
C6 N1 C3 113.3(2) . . ? 
C2 N1 C3 125.3(2) . . ? 
  
loop_ 
 _geom_hbond_atom_site_label_D 
 _geom_hbond_atom_site_label_H 
 _geom_hbond_atom_site_label_A 
 _geom_hbond_distance_DH 
 _geom_hbond_distance_HA 
 _geom_hbond_distance_DA 
 _geom_hbond_angle_DHA 
 _geom_hbond_site_symmetry_A 
N2 H2A O4  0.88 2.04 2.892(3) 162.6 . 
N2 H2B O2  0.88 2.13 3.003(3) 172.9 4_556 
O2 H2 O1  0.84 1.81 2.642(3) 170.9 1_545 
O5 H5O O3  0.84 1.82 2.642(3) 165.5 . 
O6 H6O O2  0.84 2.00 2.785(3) 155.8 1_576 
O6 H6O O7  0.84 2.26 2.704(2) 112.9 . 
O7 H7O O4  0.84 1.91 2.744(2) 172.7 4_557 
  
_diffrn_measured_fraction_theta_max    0.995 
_diffrn_reflns_theta_full              72.72 
_diffrn_measured_fraction_theta_full   0.995 
_refine_diff_density_max    0.349 
_refine_diff_density_min   -0.271 
_refine_diff_density_rms    0.058 
